# Supplementary material for: Association of jasmonic acid priming with multiple defense mechanisms in wheat plants under high salt stress
Source: PubMed Central journal article supplement (PMC9429808; doi:10.3389/fpls.2022.886862), 2022-08-16
Supplement: Data_Sheet_1.pdf [file Data_Sheet_1.pdf]

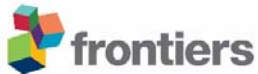

## *Supplementary Material*

### **Association of jasmonic acid priming with multiple defense mechanisms in wheat plants under high salt stress**

**Mohamed S. Sheteiwy, Zaid Ulhassan, Weicong Qi, Haiying Lu\*, Hamada AbdElgawad, Tatiana Minkina, Svetlana Sushkova, Vishnu D. Rajput, Ali El-Keblawy, Izabela Josko, Saad Sulieman, Mohamed A. El-Esawi, Khaled A. El-Tarabily\*, Synan F. AbuQamar\*, Haishui Yang, Mona Dawood**

**\* Correspondence:**

Haiying Lu [luhaiying@jaas.ac.cn](mailto:luhaiying@jaas.ac.cn)

Khaled El-Tarabily: [ktarabily@uaeu.ac.ae](mailto:ktarabily@uaeu.ac.ae)

Synan AbuQamar: [sabuqamar@uaeu.ac.ae](mailto:sabuqamar@uaeu.ac.ae)

### **Supplementary Materials**

**Table S1.** Meteorological data of temperature (°C), Rainfall (mm) and sun radiation (h) during 2018/2019 and 2019/2020 growing seasons.

**Table S2.** Some physical and chemical properties of the experimental soils used in the study during 2018/2019 and 2019/2020 growing seasons.

**Table S1.** Meteorological data of temperature (°C), Rainfall (mm) and sun radiation (h) during 2018/2019 and 2019/2020 growing seasons.

| Months   | Air temperature (°C) |           | Rainfall (mm) |           | Sun radiation (h) |           |
|----------|----------------------|-----------|---------------|-----------|-------------------|-----------|
|          | 2018/2019            | 2019/2020 | 2018/2019     | 2019/2020 | 2018/2019         | 2019/2020 |
| November | 11.4                 | 13.4      | 82.8          | 41.7      | 86.1              | 161.9     |
| December | 6.2                  | 7.3       | 117.4         | 59.1      | 76.5              | 143.9     |
| January  | 4.1                  | 5.1       | 51.5          | 75.3      | 92.5              | 44.6      |
| February | 4.4                  | 8.2       | 90.4          | 35.5      | 40.2              | 130.2     |
| March    | 11.8                 | 12.3      | 37.6          | 89.9      | 168.5             | 153.4     |
| April    | 17                   | 15.8      | 52.9          | 70.8      | 158.7             | 210.9     |
| May      | 21.8                 | 23        | 41.1          | 33.7      | 194.2             | 167.8     |
| June     | 25.4                 | 25.8      | 109.2         | 358       | 164.5             | 95.3      |

**Table S2.** Some physical and chemical properties of the experimental soils used in the study during 2018/2019 and 2019/2020 growing seasons.

| <b>Soil properties</b>        | <b>2018/2019</b>           | <b>2019/2020</b>           |
|-------------------------------|----------------------------|----------------------------|
| Clay %                        | 24.90                      | 24.30                      |
| Sand %                        | 55.60                      | 56.10                      |
| Silt %                        | 19.50                      | 19.60                      |
| Soil organic matter           | 22.45 g kg <sup>-1</sup>   | 22.30 g kg <sup>-1</sup>   |
| Total nitrogen                | 0.87 g kg <sup>-1</sup>    | 0.89 g kg <sup>-1</sup>    |
| Aalkali-hydrolyzable nitrogen | 120.96 mg kg <sup>-1</sup> | 115.75 mg kg <sup>-1</sup> |
| Available phosphorus          | 5.44 mg kg <sup>-1</sup>   | 5.64 mg kg <sup>-1</sup>   |
| Available potassium           | 58.17 mg kg <sup>-1</sup>  | 61.25 mg kg <sup>-1</sup>  |
| pH                            | 7.47                       | 7.43                       |
| Electrical conductivity (EC)  | 4.6 dSm <sup>-1</sup>      | 4.35 dSm <sup>-1</sup>     |
